# Supplementary material for: High COPD prevalence at high altitude: does household air pollution play a role?
Source: PubMed Central journal article supplement — Eur Respir J. 2019 Feb 7;53(2):1801193. doi: 10.1183/13993003.01193-2018 (PMC6428658; doi:10.1183/13993003.01193-2018), 2019-02-07

**Appendix1. English version of the questionnaire (FRESH AIR Uganda)**

Please note: This is the English version used in Uganda. In Kyrgyzstan, a Russian translation was used.

# Screening Questionnaire FRESH AIR Uganda

Interviewer:

Date of screening:

|                |            |
|----------------|------------|
| Name patient:  | ID number: |
| Date of birth: | Age:       |

Married:  yes  no Number of children alive.....deceased.....

Gender:  male  female

Weight:.....kg Length:.....cm BMI:.....

Highest education level: .....

Occupation:.....Tribal origin:.....

Village name:.....Parish.....County.....

Residence:  rural  urban  sub urban

---

**Respiratory symptoms:**

## ***Cough***

1a .Do you cough several times most day?  yes  no

1b. If 'yes', when do you cough?  I wake up with cough  
 in the morning  
 during the day  
 during the night

2. Is it a chronic cough?  yes  no

3. Do you cough with exertion?  yes  no

4. For how long have you been coughing? .....years

### ***Sputum***

5a. Do you bring up phlegm or mucus on most days?  yes  no

5b. If 'yes', when do you bring up phlegm or mucus:  first thing in the morning  
 during the day

6. Do you have chronic phlegm?  yes  no

7. Do you have phlegm or mucus when you don't have a cold?  yes  no

---

### ***Wheezing***

8a. Do you wheeze or have any whistling on the chest?  yes  no

8b. For how long do you wheeze or have any whistling on the chest? ..... years

9. Do you wake up with wheezing?  yes  no

10. Have you been at all breathless when wheezing was present?  yes  no

---

### ***Shortness of breath:***

11. Do you get out of breath more easily than others your age?  yes  no

### ***MRC breathlessness Scale***

12. Which of the following statements best describes your situation?

- 1 *Not troubled by breathlessness except on strenuous exercise*
  - 2 *Short of breath when hurrying on the level or walking up a slight hill*
  - 3 *Walks slower than most people on the level, stops after a mile or so, or stops after 15 minutes walking at own pace*
  - 4 *Stops for breath after walking about 100 yards or after walking a few minutes in level ground*
  - 5 *Too breathless to leave house, or breathless when undressing*
-

## ***Exacerbation(s)***

13a. Did you have periods of increased breathing difficulty with increased cough with or without sputum during the last 12 months?  yes  no

13b. If 'yes', how many times did you have such a period during the last 12 months?  
.....times

---

### **Tobacco use:**

14a. Do you smoke?  current smoker      how many per day.....  
 former smoker      how many per day.....  
 passive smoker       never smoker

14b. If you currently smoke or have smoked, how many years?.....years

14c. Which products:  cigarettes       cigars  
 pipes       snuff  
 chewing tobacco       water pipe  
 cannabis       leaves  
 local tobacco products, name: .....

---

## ***Biomass fuel use***

15.  indoor biomass fuel smoke:      years of exposure      .....

16.  outdoor biomass fuel smoke:      years of exposure      .....

17. Do you have a chimney in your kitchen?       yes  no

18a. Do you burn wood?       yes  no

18b. Do you burn dung?       yes  no

18c. Do you burn LPG?       yes  no

18d. Do you burn grass?       yes  no

18e. Do you burn crop residues?       yes  no

18f. Do you burn natural gas?       yes  no

18g. Do you burn charcoal?       yes  no

18h. Do you burn kerosene?       yes  no

18i. Do you use electricity?       yes  no

19. Time spent cooking indoor      .....hours/day

20. Time spent cooking outdoor .....hours/day

21. Do you use biomass fuel for heating?  yes  no

22. Where do you sleep?  same room as kitchen  
 separate room but in the same house as the kitchen  
 separate house from the kitchen

---

### ***Tuberculosis***

23. Did you ever have tuberculosis?  Yes, I have active TB now.  
 Yes, I had TB in the past but was treated and I am cured now.  
 No, I never had TB  
 I don't know

24a. Is documentation about your TB present?  yes  no

24b. if 'yes', the documentation is a

- a TB card
- a TB discharge card
- lab reports
- others.....

---

### **Disease history:**

26. Did you (recently?) have a cold gone to the chest:  yes  no

27a. Do you have allergies:  yes  no

27b. Which allergies do you have?

.....

28. How often do you have a chest infection:

- more than 2 per year
- 1 or 2 per year
- less than 1 per year

29. Do you receive treatment for breathing?

- yes
- no

30. Did you have pulmonary problems in childhood?

- yes
- no

31. What respiratory diagnosis did you receive in the past?

.....

---

### ***Comorbidity***

32. Do you have heart failure?

- yes
- no

33. Do you have AIDS/HIV?

- yes
- no

34 a. Do you have other comorbidities?

- yes
- no

34 b. Please describe any other comorbidities

.....

---

### **Medication:**

35a. Do you use medication?  yes  no

35b. What is the name of the medication that you use?.....

.....

.....

---

36a. Were you admitted to hospital during the last 2 years?     yes             no

36b. If you were admitted, please describe for what reason(s)

.....  
.....

36c. If you were admitted, please describe how often this happened during the last 2 years:

.....

37a. Did you visit healthcenters during the last 2 years?     yes             no

37b. If you did, please describe for what reason(s)

.....  
.....

37c. If you did, please describe how often this happened during the last 2 years:

.....

---

**38. CCQ score:** Total score .....

Symptom score (number 1, 2, 5 and 6) .....

Mental state score (number 3 and 4) .....

Functional state score (number 7, 8, 9 and 10) .....

---

## Spirometry

**preBD:** FVC.....Lt (.....%) FEV<sub>1</sub>.....Lt (.....%) FEV<sub>1</sub>/FVC ratio.....

**postBD:** FVC.....Lt (.....%) FEV<sub>1</sub>.....Lt (.....%) FEV<sub>1</sub>/FVC ratio.....

Reversibility.....

- |                  |                                                |                                                                            |
|------------------|------------------------------------------------|----------------------------------------------------------------------------|
| <b>Diagnosis</b> | <input type="checkbox"/> COPD, GOLD stage..... | without reversible component                                               |
|                  | <input type="checkbox"/> COPD, GOLD stage..... | with reversible component                                                  |
|                  | <input type="checkbox"/> asthma                | <input type="checkbox"/> no objective evidence of obstructive lung disease |
|                  | <input type="checkbox"/> restrictive           |                                                                            |

Appendix 2. Figure E1. Duration of PM<sub>2.5</sub> measurements per setting

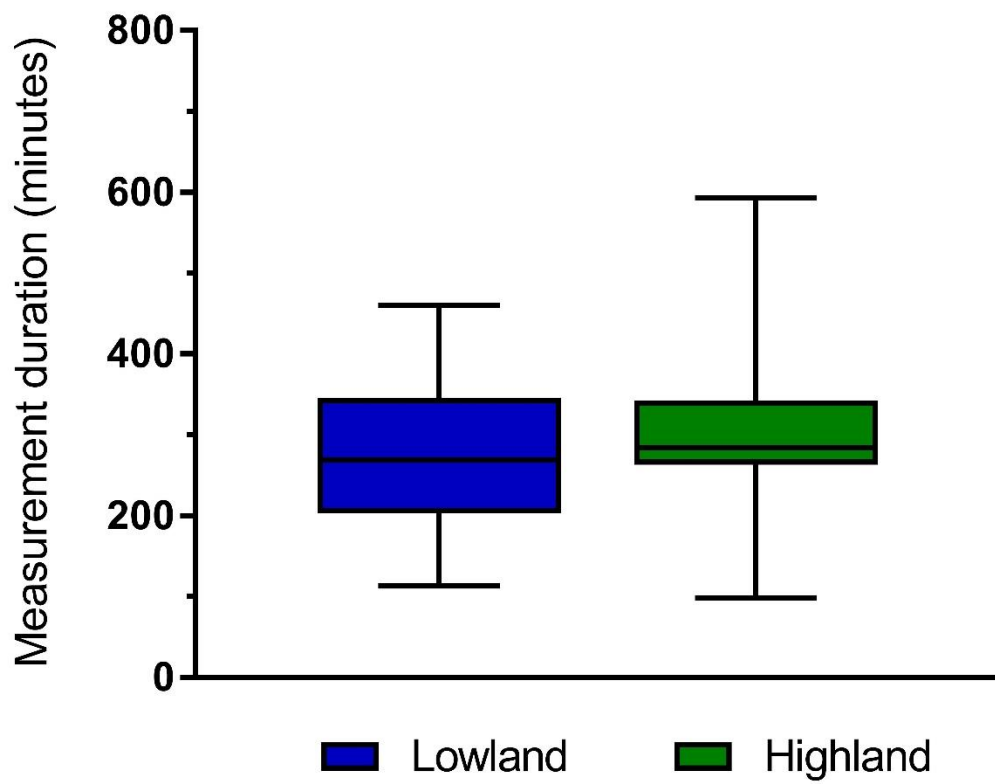



### **Appendix 3. Cooking- and heating circumstances**

#### *Cooking and heating circumstances relating to household air pollution, across altitudes*

Highlanders more commonly used solid fuels for cooking and heating than lowlanders (100% vs. 75.1%;  $p < 0.001$ ), particularly dung and wood, and their gas and electricity use was significantly lower (Table E1). Almost all highlanders cooked exclusively on open fires (95.0% vs. 0.0%;  $p < 0.001$ ) or griddle stoves (100% vs. 66.3%;  $p < 0.001$ ), and less on improved single pot stoves (34.2% vs. 74.1%;  $p < 0.001$ ). In both areas, almost all participants cooked indoors (100% in the highlands and 99.0% in the lowlands;  $p = 0.242$ ). Highlanders more commonly cooked in the same room used for living and sleeping (62.8% vs. 4.1%;  $p < 0.001$ ). Most of the participants had some type of ventilation in the room where the stove was used; in the highlands this was significantly less often an open door or window (46.7% vs. 93.3%;  $p < 0.001$ ), while a room with eaves spaces was more popular (54.8% vs. 1.6%;  $p < 0.001$ ).

**Table E1: Risk factors for household air pollution**

|                                                                   | Lowlands<br>n = 193 (%) | Highlands<br>n = 199 (%) | p-Value |
|-------------------------------------------------------------------|-------------------------|--------------------------|---------|
| Solid fuel use                                                    | 145 (75.1)              | 199 (100.0)              | <0.001  |
| Heating*                                                          | 133 (68.9)              | 199 (100.0)              | <0.001  |
| - <i>Dung</i>                                                     | 28 (14.5)               | 199 (100.0)              | <0.001  |
| - <i>Grass</i>                                                    | 0                       | 0                        | -       |
| - <i>Crop residues</i>                                            | 0                       | 11 (5.5)                 | 0.001   |
| - <i>Wood</i>                                                     | 124 (64.2)              | 177 (88.9)               | <0.001  |
| - <i>Coal</i>                                                     | 133 (68.9)              | 109 (54.8)               | 0.004   |
| Cooking*                                                          | 46 (23.8)               | 196 (98.5)               | <0.001  |
| - <i>Dung</i>                                                     | 25 (13.0)               | 191 (96.0)               | <0.001  |
| - <i>Grass</i>                                                    | 0                       | 6 (3.0)                  | 0.030   |
| - <i>Crop residues</i>                                            | 0                       | 3 (1.5)                  | 0.248   |
| - <i>Wood</i>                                                     | 26 (13.5)               | 100 (50.3)               | <0.001  |
| - <i>Coal</i>                                                     | 24 (12.4)               | 70 (35.2)                | <0.001  |
| Non-solid fuel use*                                               | 193 (100.0)             | 82 (41.2)                | <0.001  |
| - <i>Kerosene</i>                                                 | 0                       | 7 (3.5)                  | 0.015   |
| - <i>Gas (LPG)</i>                                                | 64 (33.2)               | 7 (3.5)                  | <0.001  |
| - <i>Electricity</i>                                              | 193 (100.0)             | 75 (37.7)                | <0.001  |
| Stove used for cooking*                                           |                         |                          |         |
| - Open fire                                                       | 0 (0.0)                 | 189 (95.0)               | <0.001  |
| - Surrounded fire                                                 | 0 (0.0)                 | 19 (9.5)                 | <0.001  |
| - Improved single pot stove                                       | 143 (74.1)              | 68 (34.2)                | <0.001  |
| - Improved multiple pot stove                                     | 37 (19.2)               | 20 (10.1)                | 0.010   |
| - Griddle stove                                                   | 128 (66.3)              | 199 (100.0)              | <0.001  |
| Cooking location*                                                 |                         |                          |         |
| - Outdoors                                                        | 4 (2.1)                 | 32 (16.1)                | <0.001  |
| - Indoors                                                         | 191 (99.0)              | 199 (100.0)              | 0.242   |
| ➤ <i>Time cooking indoors</i><br><i>(hours/day), median [IQR]</i> | 2.0 [1.0; 2.0]          | 2.0 [0.0; 4.0]           | 0.563   |
| ➤ <i>In same room as living/sleeping</i><br><i>room</i>           | 8 (4.1)                 | 125 (62.8)               | <0.001  |
| Presence of hood/chimney                                          | 157 (81.3)              | 164 (82.4)               | 0.784   |
| Ventilation*                                                      |                         |                          |         |
| - Closed room                                                     | 5 (2.6)                 | 3 (1.5)                  | 0.497   |
| - Room with open door/window                                      | 180 (93.3)              | 93 (46.7)                | <0.001  |
| - Room with ≤3 walls                                              | 5 (2.6)                 | 16 (8.0)                 | 0.017   |
| - Room with eaves spaces                                          | 3 (1.6)                 | 109 (54.8)               | <0.001  |

LPG = liquefied petroleum gas; IQR = interquartile range. Values are n (%) unless stated otherwise. \*Multiple answers could be given to this question. Sub-questions are shown in italics. There were no missing values.

## Appendix 4. COPD and its risk factors

**Figure E1: COPD prevalence in lowlands and highlands by sex and smoking status**

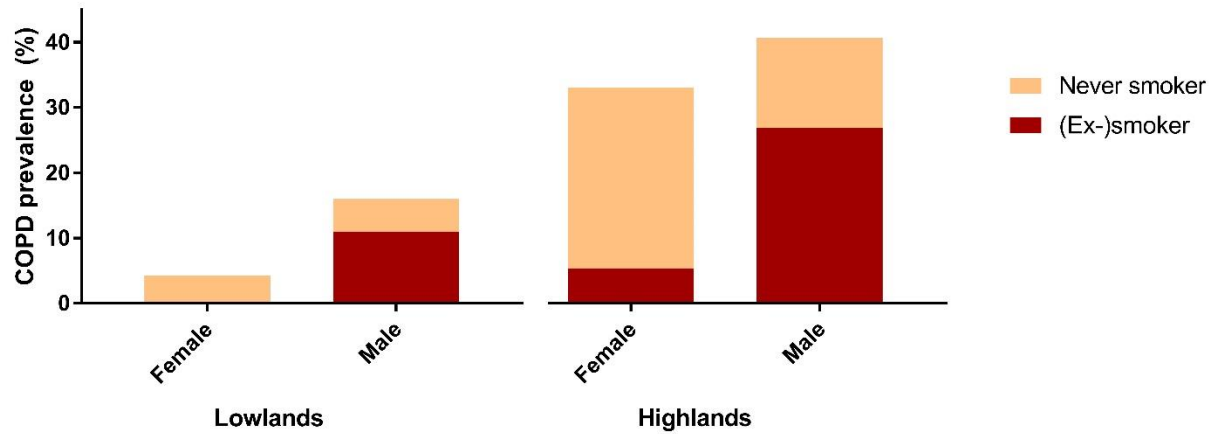

**Table E1: Univariable and multivariable predictors for COPD**

|                                                                     | Univariable<br>OR (95% CI) | P-Value | Multivariable<br>OR (95% CI) | P-Value |
|---------------------------------------------------------------------|----------------------------|---------|------------------------------|---------|
| Age (per year increase)                                             | 1.055 (1.036-1.073)        | <0.001  | 1.058 (1.037-1.079)          | <0.001  |
| Male                                                                | 1.460 (1.041-2.047)        | 0.028   | 1.614 (0.889-2.930)          | 0.116   |
| Pack years                                                          | 1.031 (1.011-1.052)        | 0.002   | 1.037 (1.005-1.070)          | 0.024   |
| Higher education*                                                   | 1.483 (0.800-2.752)        | 0.211   | 1.107 (0.376-3.264)          | 0.853   |
| Working in primary/secondary sector                                 | 1.194 (0.699-2.039)        | 0.516   | 0.908 (0.432-1.908)          | 0.798   |
| High altitude                                                       | 5.064 (2.217-11.568)       | <0.001  | 3.406 (1.483-7.825)          | 0.004   |
| HAP – middle exposure group<br>(reference = lowest exposure group)  | 3.433 (1.329-8.866)        | 0.011   | 2.372 (0.763-7.377)          | 0.136   |
| HAP – highest exposure group<br>(reference = lowest exposure group) | 6.714 (2.614-17.249)       | <0.001  | 3.174 (1.061-9.493)          | 0.039   |

COPD (n = 91) vs. no COPD (n = 293). Generalised Estimating Equation analyses adjusted for a clustering effect within households. \*The highest level of completed education above secondary education. Household air pollution (HAP) was categorised into a lowest, middle and highest tertiles of exposure, respectively with time-weighted average concentrations of particulate matter<sub>2.5</sub> of  $\leq 72$ ,  $>72$ -293 and  $>293$   $\mu\text{g}/\text{m}^3$ .

Figure E2: Lung function and particulate matter exposure

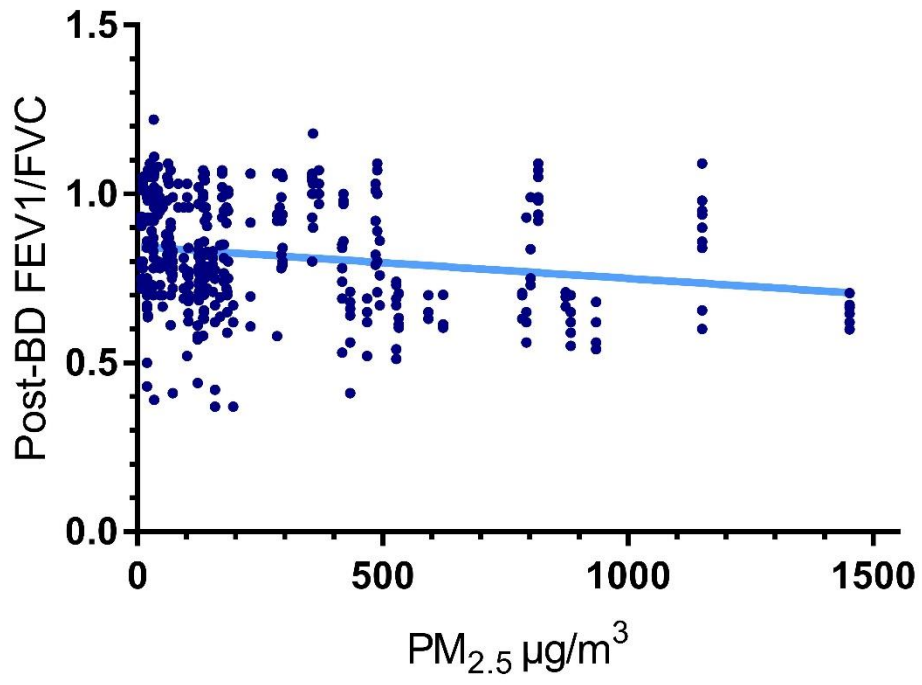

Supplement: ERJ-01193-2018_Supplement.pdf [file ERJ-01193-2018_Supplement.pdf]
